# Supplementary material for: Is the Membrane Lipid Matrix a Key Target for Action of Pharmacologically Active Plant Saponins?
Source: PubMed Central journal article supplement (PMC8003763; doi:10.3390/ijms22063167), 2021-03-20
Supplement: ijms-22-03167-s001.pdf [file ijms-22-03167-s001.pdf]

Supplementary material

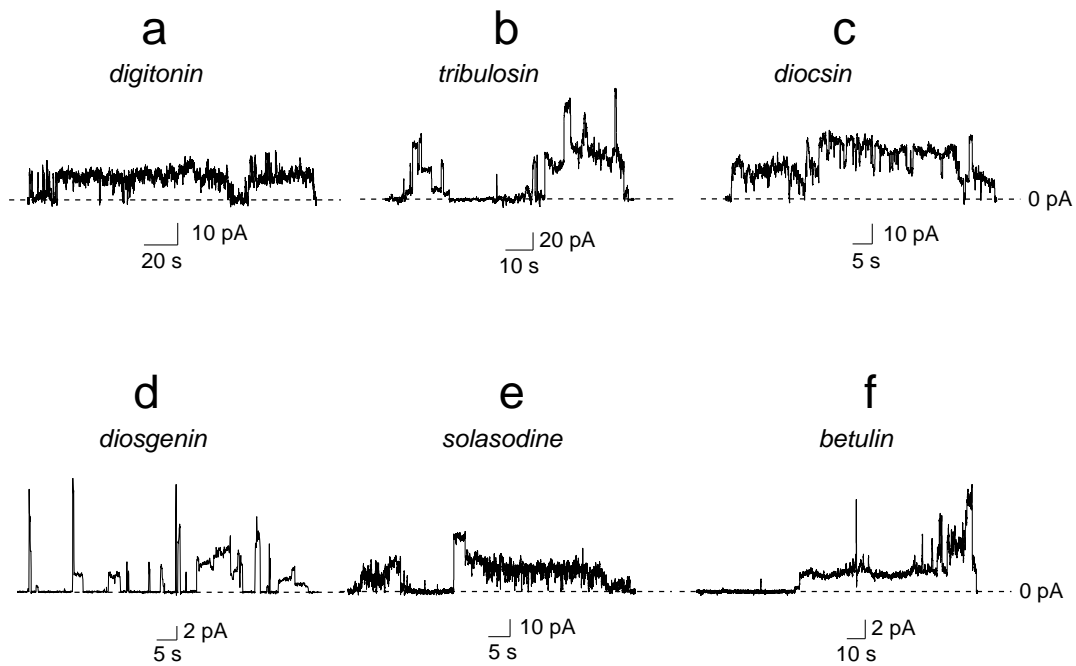

**Figure S1.** Current fluctuations corresponding to the openings and closures of single ion-permeable pores induced by 75  $\mu\text{M}$  of digitonin (a), 125  $\mu\text{M}$  of tribulosin (b), 100  $\mu\text{M}$  of dioscin (c), 125  $\mu\text{M}$  of diosgenin (d), 100  $\mu\text{M}$  of solasodine (e), and 100  $\mu\text{M}$  of betulin (f) in lipid bilayers composed of DPhPC/CHOL and bathed in 0.1 M KCl (pH 7.4).  $V$  was equal to 100 mV.

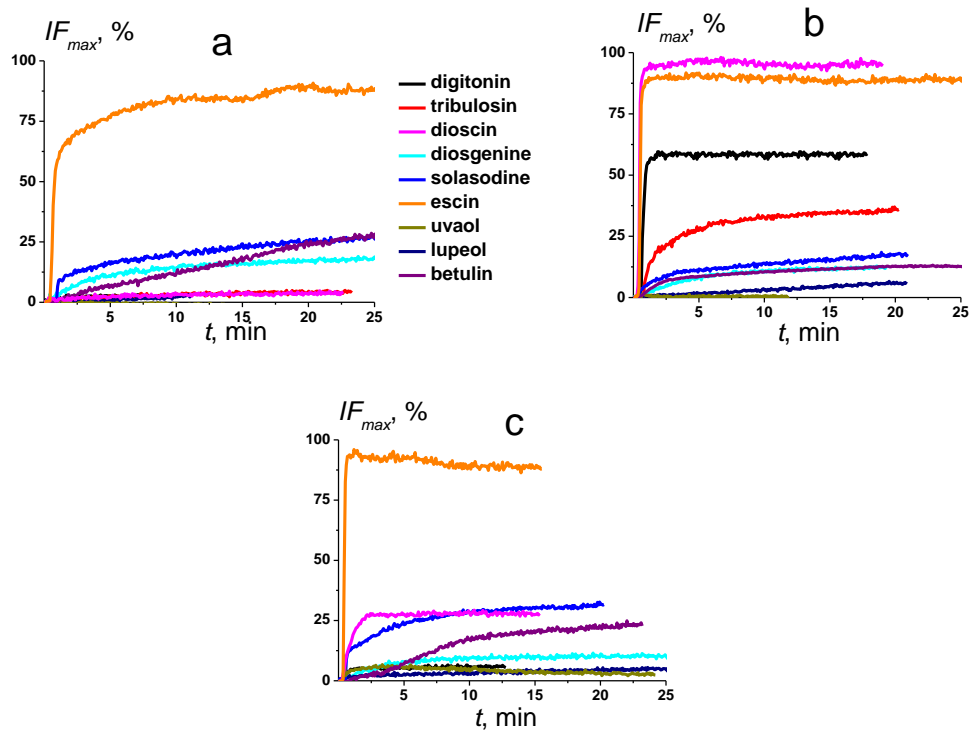

**Figure S2.** The time dependence of relative fluorescence of calcein ( $IF_{max, \%}$ ) leaked from POPC (a), POPC/CHOL (b), and POPG (c) vesicles. 50  $\mu\text{M}$  of saponins or related compounds were added into the

liposomal suspension at the first time point. The relationship between the color line and the compound is given in the figure.

**Table S1.** The desorption constants of the tested compounds ( $K$ ,  $\mu\text{M}$ )

| <i>compound</i>   | <i>DPhPC</i> | <i>DPhPC/CHOL</i> |
|-------------------|--------------|-------------------|
| <i>digitonin</i>  | $14 \pm 2$   | $11 \pm 3$        |
| <i>tribulosin</i> | $17 \pm 4$   | $12 \pm 3$        |
| <i>dioscin</i>    | $9 \pm 1$    | $4 \pm 2$         |
| <i>diosgenin</i>  | –#           | –#                |
| <i>solasodine</i> | –#           | –#                |
| <i>escin</i>      | $6 \pm 2$    | $3 \pm 2$         |
| <i>uvaol</i>      | –#           | –#                |
| <i>lupeol</i>     | –#           | –#                |
| <i>betulin</i>    | –#           | –#                |

# desorption constant cannot be determined due to the small absolute value of  $\Delta\phi_b(\text{max})$ .

**Table S2.** The changes in the enthalpy of the main phase transition of different lipids at 50  $\mu\text{M}$  of saponins and related compounds ( $-\Delta\Delta H$ ,  $\text{kcal/mol}$ )

| <i>compound</i>   | <i>DPPC</i>   | <i>DPPC/CHOL</i> | <i>DPPG</i>   |
|-------------------|---------------|------------------|---------------|
| <i>digitonin</i>  | $0.5 \pm 0.1$ | $0.6 \pm 0.2$    | $0.6 \pm 0.3$ |
| <i>tribulosin</i> | $0.1 \pm 0.1$ | $0.7 \pm 0.2$    | $0.4 \pm 0.2$ |
| <i>dioscin</i>    | $0.3 \pm 0.2$ | $0.5 \pm 0.1$    | $0.4 \pm 0.2$ |
| <i>diosgenin</i>  | $0.6 \pm 0.2$ | $0.9 \pm 0.2$    | $0.5 \pm 0.3$ |
| <i>solasodine</i> | $0.3 \pm 0.2$ | $0.5 \pm 0.4$    | $0.1 \pm 0.1$ |
| <i>escin</i>      | $0.1 \pm 0.1$ | $0.5 \pm 0.2$    | $0.2 \pm 0.1$ |
| <i>uvaol</i>      | $0.1 \pm 0.1$ | $1.0 \pm 0.4$    | $0.1 \pm 0.1$ |
| <i>lupeol</i>     | $0.1 \pm 0.1$ | $1.5 \pm 0.3$    | $0.3 \pm 0.1$ |
| <i>betulin</i>    | $0.2 \pm 0.1$ | $1.4 \pm 0.3$    | $0.4 \pm 0.2$ |

The enthalpy of the main phase transition of untreated DPPC, DPPC/CHOL, and DPPG is 9.0, 9.5, and 10  $\text{kcal/mol}$  respectively.

**Table S3.** The characteristics of action of saponins and related compounds on the calcein release from liposomes of different composition:  $IF_{\text{max}}$  – the maximal leakage of fluorescent marker from vesicles;  $t$  – characteristic parameter of the time dependences of marker leakage.

| <i>compound</i>   | $C$ , $\mu\text{M}$ | $IF_{\text{max}}$ , % |                  |             | $t$ , min   |                  |               |
|-------------------|---------------------|-----------------------|------------------|-------------|-------------|------------------|---------------|
|                   |                     | <i>POPC</i>           | <i>POPC/CHOL</i> | <i>POPG</i> | <i>POPC</i> | <i>POPC/CHOL</i> | <i>POPG</i>   |
| <i>digitonin</i>  | 5                   | $2 \pm 2$             | $3 \pm 2$        | $3 \pm 2$   | –           | –                | –             |
|                   | 50                  | $3 \pm 2$             | $58 \pm 4$       | $6 \pm 2$   | –           | $0.3 \pm 0.1$    | –             |
|                   | 150                 | $5 \pm 2$             | $74 \pm 3$       | $21 \pm 6$  | –           | $0.1 \pm 0.1$    | $0.1 \pm 0.1$ |
| <i>tribulosin</i> | 5                   | $4 \pm 2$             | $9 \pm 3$        | $3 \pm 2$   | –           | –                | –             |
|                   | 50                  | $5 \pm 2$             | $25 \pm 2$       | $6 \pm 2$   | –           | $1.8 \pm 0.5$    | –             |
|                   | 150                 | $6 \pm 3$             | $27 \pm 3$       | $14 \pm 5$  | –           | $0.6 \pm 0.2$    | $1.3 \pm 0.1$ |
| <i>dioscin</i>    | 5                   | $2 \pm 2$             | $40 \pm 5$       | $24 \pm 4$  | –           | $0.5 \pm 0.1$    | $3.9 \pm 0.4$ |
|                   | 50                  | $4 \pm 2$             | $71 \pm 4$       | $29 \pm 5$  | –           | $0.2 \pm 0.1$    | $0.7 \pm 0.2$ |
|                   | 150                 | $5 \pm 3$             | $88 \pm 2$       | $59 \pm 6$  | –           | $0.1 \pm 0.1$    | $0.5 \pm 0.2$ |

|                   |     |         |         |        |            |           |           |
|-------------------|-----|---------|---------|--------|------------|-----------|-----------|
| <i>diosgenin</i>  | 5   | 6 ± 4   | 8 ± 3   | 4 ± 2  | –          | –         | –         |
|                   | 50  | 18 ± 3  | 12 ± 2  | 10 ± 3 | 6.7 ± 0.8  | 4.3 ± 0.7 | –         |
|                   | 150 | 33 ± 8  | 53 ± 14 | 31 ± 7 | 5.8 ± 1.3  | 4.8 ± 1.5 | 7 ± 1     |
| <i>solasodine</i> | 5   | 6 ± 3   | 5 ± 2   | 16 ± 4 | –          | –         | 0.9 ± 0.1 |
|                   | 50  | 30 ± 5  | 17 ± 3  | 32 ± 5 | 11.7 ± 0.5 | 1.8 ± 0.4 | 3.8 ± 0.5 |
|                   | 150 | 70 ± 5  | 71 ± 3  | 83 ± 6 | 1.8 ± 0.2  | 1.5 ± 0.9 | 2.3 ± 0.2 |
| <i>escin</i>      | 5   | 10 ± 4  | 42 ± 5  | 50 ± 3 | 8.4 ± 0.5  | 1.2 ± 0.4 | 0.4 ± 0.1 |
|                   | 50  | 80 ± 5  | 82 ± 4  | 79 ± 2 | 1.3 ± 0.1  | 0.2 ± 0.1 | 0.1 ± 0.1 |
|                   | 150 | 82 ± 5  | 88 ± 2  | 80 ± 5 | 0.2 ± 0.1  | 0.1 ± 0.1 | 0.1 ± 0.1 |
| <i>uvaol</i>      | 5   | 2 ± 1   | 2 ± 1   | 2 ± 2  | –          | –         | –         |
|                   | 50  | 2 ± 2   | 2 ± 2   | 2 ± 2  | –          | –         | –         |
|                   | 150 | 2 ± 1   | 2 ± 1   | 2 ± 1  | –          | –         | –         |
| <i>lupeol</i>     | 5   | 2 ± 2   | 3 ± 2   | 3 ± 2  | –          | –         | –         |
|                   | 50  | 3 ± 2   | 4 ± 2   | 3 ± 2  | –          | –         | –         |
|                   | 150 | 4 ± 2   | 5 ± 1   | 4 ± 1  | –          | –         | –         |
| <i>betulin</i>    | 5   | 5 ± 3   | 5 ± 2   | 5 ± 3  | –          | –         | –         |
|                   | 50  | 17 ± 6  | 14 ± 4  | 20 ± 4 | 56 ± 4     | 5 ± 1     | 11 ± 1    |
|                   | 150 | 20 ± 12 | 22 ± 3  | 22 ± 3 | 1.6 ± 0.3  | 3 ± 1     | 2 ± 1     |
